# Supplementary material
Source: MDPI journal article supplement (https://www.mdpi.com/2311-7524/9/3/407)
Supplement: s1 [file s1]

**Supplementary Table S1.** Influence of PGR and compounds on the shoot regeneration (%) on different starting explant types. Data are presented as mean  $\pm$  SE. Means followed by the same letter are not significantly different at  $\alpha = 0.05$ , according to Tukey HSD test.

| Explant type                                    | PGR<br>(concentration)<br>added to MSS<br>medium | Compounds<br>(concentration)<br>added to MSS medium   | Medium<br>acronym | Shoot<br>regeneration<br>(%) |
|-------------------------------------------------|--------------------------------------------------|-------------------------------------------------------|-------------------|------------------------------|
| First true leaf<br>( <i>in vivo</i> )           | BA (1 mg/L)                                      | /                                                     | MSS1              | 28.89 $\pm$ 6.33 c           |
|                                                 | BA (1 mg/L)                                      | + Citric acid (10 mg/L)<br>+ Ascorbic acid (100 mg/L) | MSS1aox           | 32.64 $\pm$ 7.79 d           |
|                                                 | TDZ (4 mg/L)                                     | /                                                     | MSS2              | 0.0 $\pm$ 0.0 a              |
|                                                 | TDZ (4 mg/L)                                     | + Citric acid (10 mg/L)<br>+ Ascorbic acid (100 mg/L) | MSS2aox           | 8.22 $\pm$ 3.78 b            |
| First true leaf<br>( <i>in vitro</i> )          | BA (1 mg/L)                                      | /                                                     | MSS1              | 10.15 $\pm$ 6.45 bc          |
|                                                 | BA (1 mg/L)                                      | + Citric acid (10 mg/L)<br>+ Ascorbic acid (100 mg/L) | MSS1aox           | 17,37 $\pm$ 2.75 c           |
|                                                 | TDZ (4 mg/L)                                     | /                                                     | MSS2              | 0.0 $\pm$ 0.0 a              |
|                                                 | TDZ (4 mg/L)                                     | + Citric acid (10 mg/L)<br>+ Ascorbic acid (100 mg/L) | MSS2aox           | 14 $\pm$ 3.63 c              |
| Hypocotyls<br>( <i>in vitro</i> )               | IAA (1 mg/L)                                     | + ZnSO <sub>4</sub> (12.9 mg/L)                       | MSS3              | 2.5 $\pm$ 1.30 ab            |
|                                                 | TDZ (4 mg/L)                                     | /                                                     | MSS2              | 4.47 $\pm$ 1.88 b            |
|                                                 | TDZ (4 mg/L)                                     | + Citric acid (10 mg/L)<br>+ Ascorbic acid (100 mg/L) | MSS2aox           | 9.18 $\pm$ 2.43 bc           |
| Cotyledons<br>( <i>in vitro</i> )               | IAA (1 mg/L)                                     | + ZnSO <sub>4</sub> (12.9 mg/L)                       | MSS3              | 4.5 $\pm$ 1.69 b             |
|                                                 | TDZ (4 mg/L)                                     | /                                                     | MSS2              | 19.7 $\pm$ 8.31 b            |
| Cotyledonary nodes (CNs)<br>( <i>in vitro</i> ) | TDZ (4 mg/L)                                     | /                                                     | MSS2              | 93.5 $\pm$ 2.31 e            |
